# Supplementary material
Source: Springer Nature journal article supplement (https://www.springermedizin.de/resource/supplementary/12958_2009_503_MOESM5_ESM.pdf/9568162)

**A****NTPDase3 levels in the lateral hypothalamus**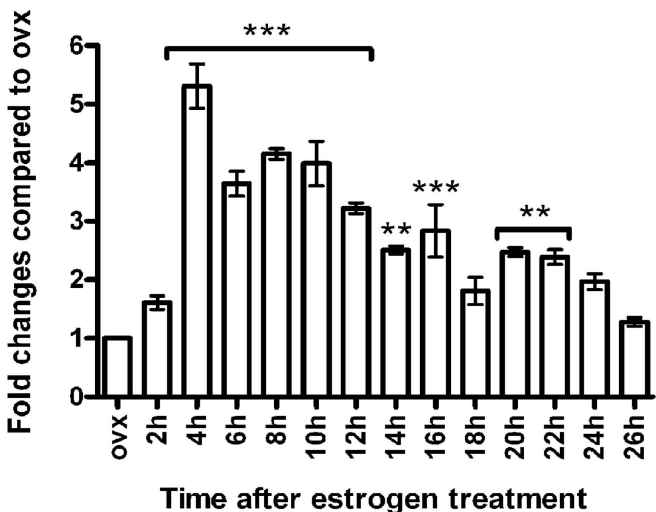**B****NTPDase3 levels in the medial hypothalamus**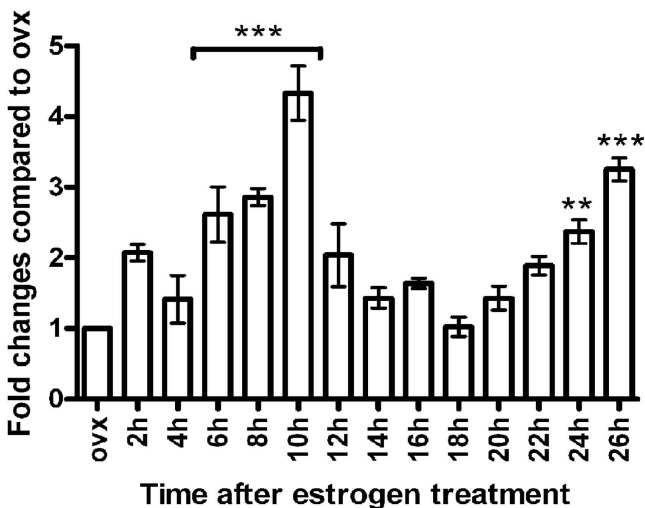**C****Estrogen concentrations after a single subcutaneous injection of 17beta estradiol (pg/ml)**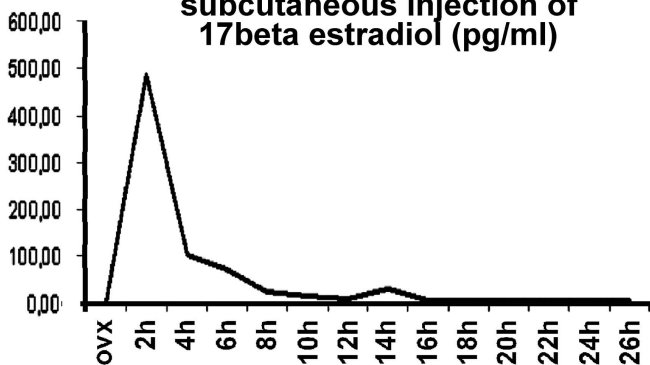

Supplement: MOESM5 [file 9568162]
